# Supplementary material
Source: MDPI journal article supplement (https://www.mdpi.com/2297-8739/8/7/103)
Supplement: s1 [file s1]

# Detailed Group-Type Characterization of Plastic-Waste Pyrolysis Oils: By Comprehensive Two-Dimensional Gas Chromatography Including Linear, Branched, and Di-Olefins

Hang Dao Thi, Marko R. Djokic and Kevin M. Van Geem \*

Laboratory for Chemical Technology, Ghent University, Technologiepark 121, 9052 Ghent, Belgium; hang.daothi@ugent.be (H.D.T.); marko.djokic@ugent.be (M.R.D.)

\* Correspondence: kevin.vangeem@ugent.be

## Contents

**Table S1.** Composition (wt%) of the diesel fraction in terms of all detected pure hydrocarbons and oxygenates by group types and carbon number (P = n-paraffins, I = iso-paraffins, O =  $\alpha$ -olefins, IO = iso-olefins, DO = diolefins, MN = mononaphthenes + unsaturated mononaphthenes), DN = dinaphthenes, MA = monoaromatics, NA = naphthenoaromatics, Ot = oxygen-containing compounds).

| #C    | P     | IP   | O     | IO   | DO   | MN    | DN   | MA   | NA   | Ot   |
|-------|-------|------|-------|------|------|-------|------|------|------|------|
| 1     | 0.00  | 0.00 | 0.00  | 0.00 | 0.00 | 0.00  | 0.00 | 0.00 | 0.00 | 0.00 |
| 2     | 0.00  | 0.00 | 0.00  | 0.00 | 0.00 | 0.00  | 0.00 | 0.00 | 0.00 | 0.00 |
| 3     | 0.00  | 0.00 | 0.00  | 0.00 | 0.00 | 0.00  | 0.00 | 0.00 | 0.00 | 0.00 |
| 4     | 0.00  | 0.00 | 0.00  | 0.00 | 0.00 | 0.00  | 0.00 | 0.00 | 0.00 | 0.00 |
| 5     | 0.00  | 0.00 | 0.00  | 0.00 | 0.00 | 0.00  | 0.00 | 0.00 | 0.00 | 0.02 |
| 6     | 0.00  | 0.00 | 0.00  | 0.00 | 0.00 | 0.00  | 0.00 | 0.00 | 0.00 | 0.00 |
| 7     | 0.01  | 0.00 | 0.01  | 0.00 | 0.00 | 0.00  | 0.00 | 0.01 | 0.00 | 0.00 |
| 8     | 0.02  | 0.00 | 0.02  | 0.00 | 0.00 | 0.02  | 0.00 | 0.01 | 0.00 | 0.01 |
| 9     | 0.14  | 0.19 | 0.16  | 0.08 | 0.01 | 0.09  | 0.01 | 0.05 | 0.00 | 0.00 |
| 10    | 1.45  | 0.08 | 2.22  | 0.19 | 0.06 | 0.84  | 0.17 | 0.06 | 0.02 | 0.00 |
| 11    | 2.65  | 0.20 | 4.42  | 0.65 | 0.23 | 1.62  | 0.16 | 0.04 | 0.03 | 0.00 |
| 12    | 2.89  | 0.26 | 4.20  | 0.91 | 0.34 | 1.73  | 0.14 | 0.08 | 0.05 | 0.00 |
| 13    | 3.00  | 0.24 | 4.24  | 0.88 | 0.49 | 1.66  | 0.35 | 0.07 | 0.04 | 0.00 |
| 14    | 3.03  | 0.39 | 4.47  | 0.87 | 0.58 | 1.73  | 0.23 | 0.06 | 0.05 | 0.00 |
| 15    | 3.05  | 0.40 | 4.06  | 0.95 | 0.41 | 1.30  | 0.24 | 0.06 | 0.06 | 0.00 |
| 16    | 2.92  | 0.58 | 3.37  | 0.93 | 0.52 | 1.86  | 0.23 | 0.06 | 0.05 | 0.00 |
| 17    | 2.76  | 0.59 | 2.93  | 0.95 | 0.45 | 1.25  | 0.24 | 0.07 | 0.08 | 0.00 |
| 18    | 2.59  | 0.46 | 2.74  | 0.83 | 0.52 | 1.28  | 0.13 | 0.08 | 0.07 | 0.00 |
| 19    | 2.37  | 0.38 | 2.40  | 0.79 | 0.30 | 0.82  | 0.20 | 0.04 | 0.06 | 0.00 |
| 20    | 1.19  | 0.22 | 0.91  | 0.66 | 0.27 | 0.36  | 0.18 | 0.03 | 0.04 | 0.00 |
| 21    | 0.24  | 0.08 | 0.23  | 0.05 | 0.03 | 0.05  | 0.02 | 0.00 | 0.00 | 0.00 |
| 22    | 0.02  | 0.00 | 0.02  | 0.00 | 0.00 | 0.00  | 0.00 | 0.00 | 0.00 | 0.00 |
| 23    | 0.00  | 0.00 | 0.00  | 0.00 | 0.00 | 0.00  | 0.00 | 0.00 | 0.00 | 0.00 |
| Total | 28.36 | 4.05 | 36.39 | 8.77 | 4.21 | 14.62 | 2.30 | 0.72 | 0.53 | 0.03 |

**Table S2.** Composition (wt%) of plastic waste pyrolysis oil derived naphtha fraction in terms of all detected pure hydrocarbons and oxygenates by group types and carbon number (P = n-paraffins, I = iso-paraffins, O =  $\alpha$ -olefins, IO = iso-olefins, DO = diolefins, MN = mononaphthenes + unsaturated mononaphthenes), DN = dinaphthenes, MA = monoaromatics, NA = naphthenoaromatics, Ot = oxygen-containing compounds).

| #C    | P     | IP   | O     | IO   | DO   | MN    | DN   | MA   | NA   | Ot   |
|-------|-------|------|-------|------|------|-------|------|------|------|------|
| 1     | 0.00  | 0.00 | 0.00  | 0.00 | 0.00 | 0.00  | 0.00 | 0.00 | 0.00 | 0.00 |
| 2     | 0.00  | 0.00 | 0.00  | 0.00 | 0.00 | 0.00  | 0.00 | 0.00 | 0.00 | 0.00 |
| 3     | 0.00  | 0.00 | 0.00  | 0.00 | 0.00 | 0.00  | 0.00 | 0.00 | 0.00 | 0.00 |
| 4     | 0.00  | 0.00 | 0.00  | 0.00 | 0.00 | 0.00  | 0.00 | 0.00 | 0.00 | 0.00 |
| 5     | 0.34  | 0.02 | 0.53  | 0.34 | 0.00 | 0.40  | 0.00 | 0.00 | 0.00 | 0.00 |
| 6     | 2.03  | 0.14 | 5.28  | 0.63 | 0.00 | 3.03  | 0.00 | 0.64 | 0.00 | 0.00 |
| 7     | 3.99  | 0.40 | 7.87  | 0.52 | 0.98 | 5.85  | 2.76 | 2.17 | 0.00 | 0.02 |
| 8     | 3.83  | 0.67 | 8.70  | 1.84 | 0.95 | 5.91  | 1.58 | 3.70 | 0.00 | 0.04 |
| 9     | 3.61  | 0.31 | 8.07  | 3.98 | 1.52 | 3.31  | 1.10 | 2.20 | 0.08 | 0.00 |
| 10    | 1.37  | 0.25 | 4.48  | 1.58 | 0.71 | 1.37  | 0.09 | 0.39 | 0.00 | 0.00 |
| 11    | 0.05  | 0.02 | 0.16  | 0.16 | 0.04 | 0.01  | 0.00 | 0.00 | 0.00 | 0.00 |
| Total | 15.22 | 1.80 | 35.08 | 9.06 | 4.20 | 19.87 | 5.52 | 9.10 | 0.08 | 0.06 |

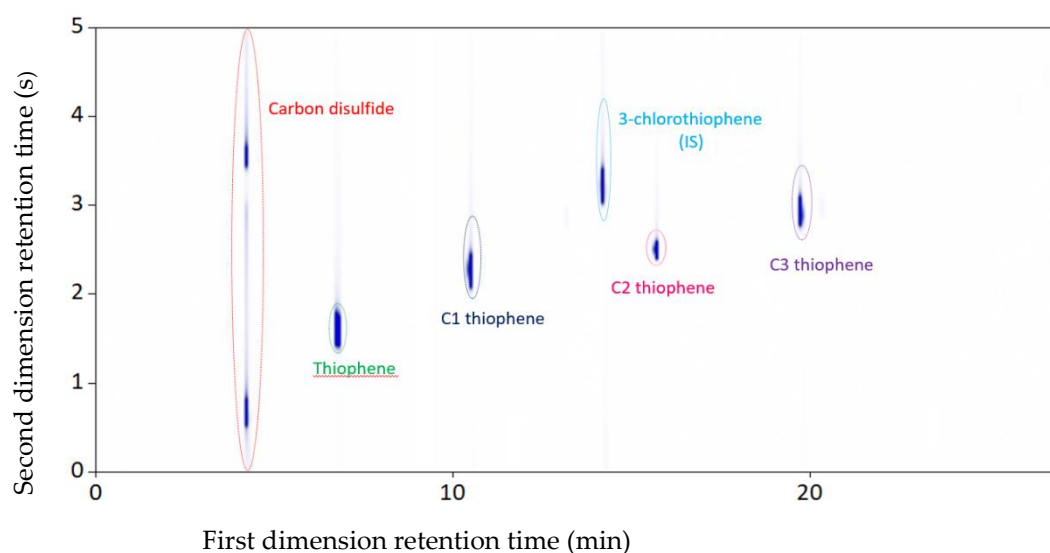

**Figure S1.** GC × GC - SCD chromatogram of the reference mixture obtained using an RTX-1 PONA column in the first dimension combined with BPX-50 column in the second dimension.

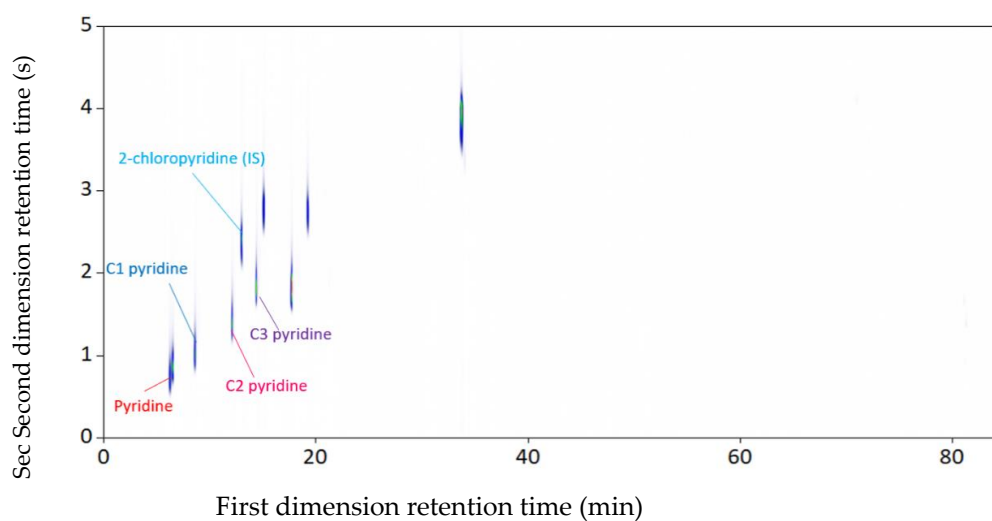

**Figure S2.** GC × GC - NCD chromatogram of the reference mixture obtained using an RTX-1 PONA column in the first dimension combined with BPX-50 column in the second dimension.
